# Supplementary material for: Shear-induced self-assembly of linear ABC triblock copolymers in solution: creation of 1D cylindrical micellar structures
Source: Royal Society of Chemistry journal article supplement (doi:10.1039/c5ra23474c), 2015-12-11

# Shear-induced self-assembly of linear ABC triblock copolymers in solutions: Creation of 1D cylindrical Micellar Structures

Yang Zhou,<sup>\*a</sup> Chun Zhou,<sup>a,b</sup> Xi He,<sup>a,c</sup> Xianggui Xue,<sup>a</sup> Wen Qian<sup>a</sup> Shikai Luo<sup>a</sup> and Honggang Xia<sup>\*b</sup>

<sup>a</sup> Institute of Chemical Materials, Chinese Academy of Engineering and Physics, Mianyang, 621900, China;

<sup>b</sup> School of Materials Science and Engineering, Southwest University of Science and Technology, 621010 Mianyang, China;

<sup>c</sup> School of Mechanical and Electrical Engineering, Beijing Institute of Technology, 100081, Beijing, China.

E-mail: zhouy@caep.cn (Y.Z.)

## Supporting Information

### Figure Legends

**Figure S1.** Morphological phase diagrams of *I*-ACB vs. the different shear rate  $\dot{\gamma}$  at the concentration  $\phi=0.1$ . Color scheme in the snapshots: A (blue), B (red), C (yellow). For clarity, block A (blue) is omitted for some micelles.

**Figure S2.** Morphological phase diagrams of *I*-ABC vs. the different shear rate  $\dot{\gamma}$  at the concentration  $\phi=0.1$ . Color scheme in the snapshots: A (blue), B (red), C (yellow). For clarity, block A (blue) is omitted for some micelles.

**Figure S3.** Morphological phase diagrams of *I*-BAC vs. the different shear rate  $\dot{\gamma}$  at the concentration  $\phi=0.1$ . Color scheme in the snapshots: A (blue), B (red), C (yellow). For clarity, block A (blue) is omitted for some micelles.

**Figure S4.** Morphological phase diagrams of *I*-ACB vs. the different shear rate  $\dot{\gamma}$  at the concentration  $\phi=0.2$ . Color scheme in the snapshots: A (blue), B (red), C (yellow). For clarity, block A (blue) is omitted for some micelles.

**Figure S5.** Morphological phase diagrams of *I*-ABC vs. the different shear rate  $\dot{\gamma}$  at the concentration  $\phi=0.2$ . Color scheme in the snapshots: A (blue), B (red), C (yellow). For clarity, block A (blue) is omitted for some micelles.

**Figure S6.** Morphological phase diagrams of *I*-BAC vs. the different shear rate  $\dot{\gamma}$  at the concentration  $\phi=0.2$ . Color scheme in the snapshots: A (blue), B (red), C (yellow). For clarity, block A (blue) is omitted for some micelles.

**Figure S7.** Morphological phase diagrams of *I*-ACB vs. the different shear rate  $\dot{\gamma}$  at the concentration  $\phi=0.3$ . Color scheme in the snapshots: A (blue), B (red), C (yellow). For clarity, block A (blue) is omitted for some micelles.

**Figure S8.** Morphological phase diagrams of *I*-ABC vs. the different shear rate  $\dot{\gamma}$  at the concentration  $\phi=0.3$ . Color scheme in the snapshots: A (blue), B (red), C (yellow). For clarity, block A (blue) is omitted for some micelles.

**Figure S9.** Morphological phase diagrams of *I*-BAC vs. the different shear rate  $\dot{\gamma}$  at the concentration  $\phi=0.3$ . Color scheme in the snapshots: A (blue), B (red), C (yellow). For clarity, block A (blue) is omitted for some micelles.

**Figure S1.**

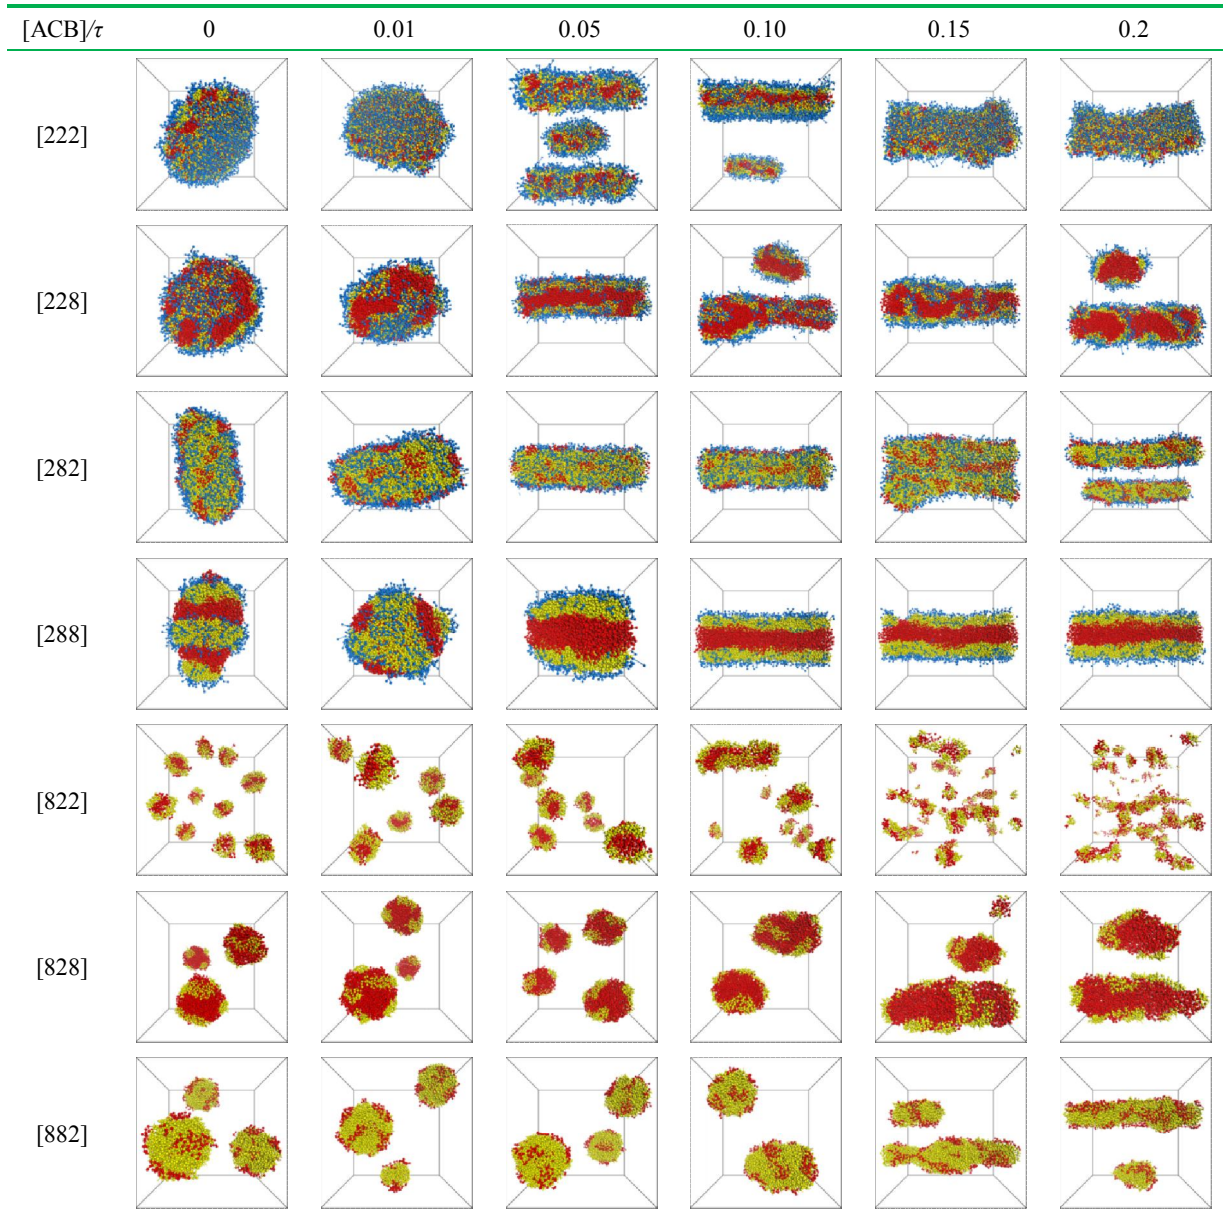

**Figure S2.**

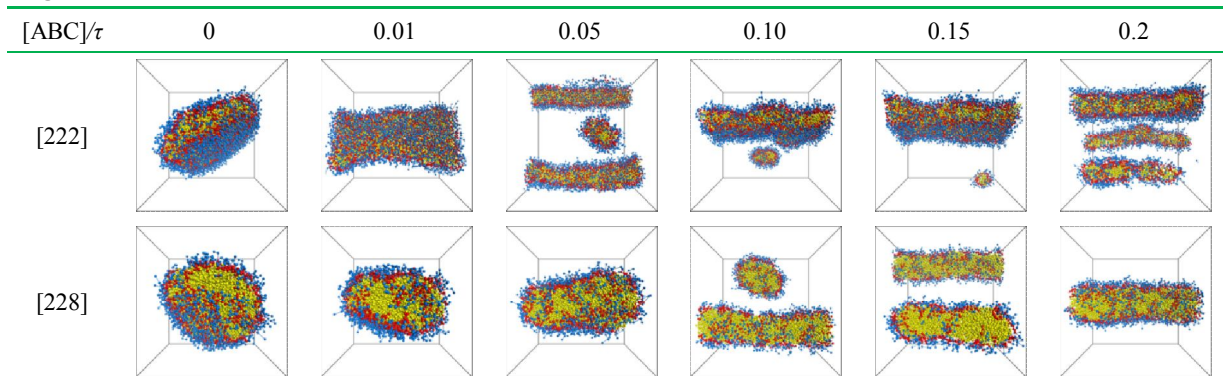

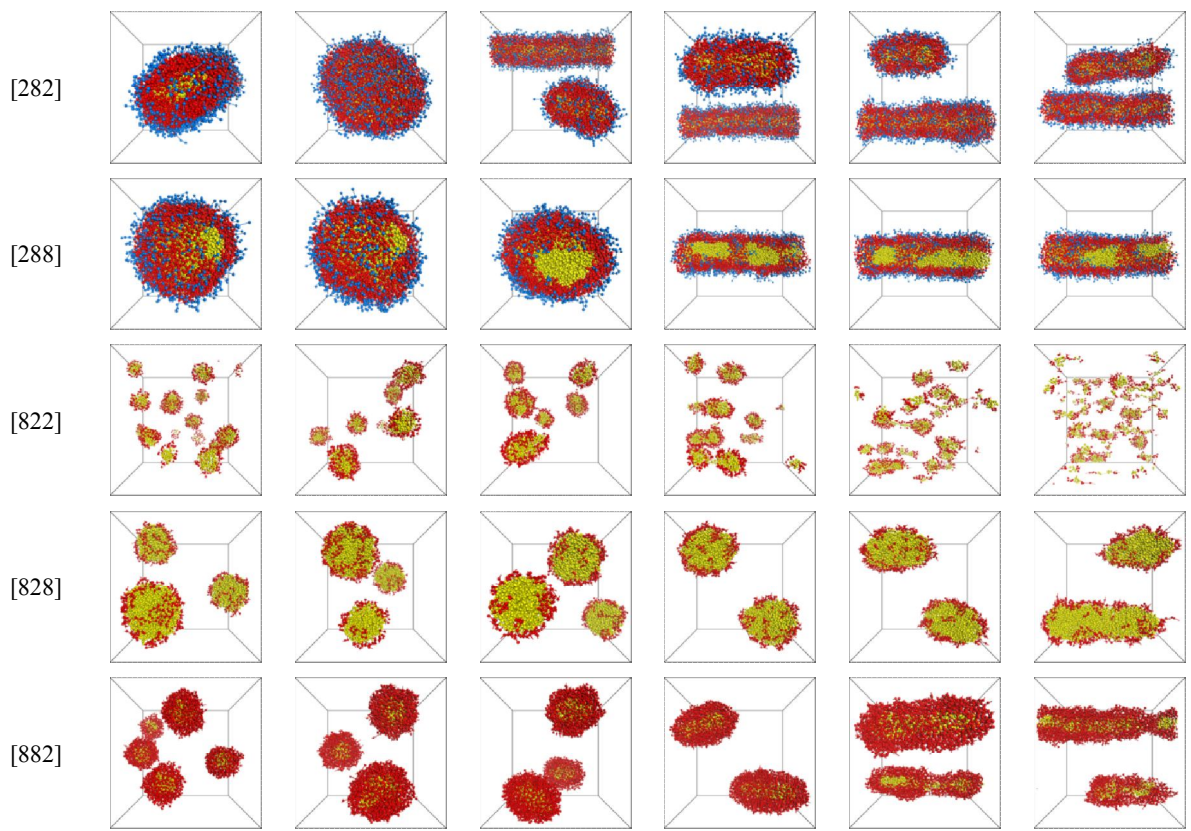

**Figure S3.**

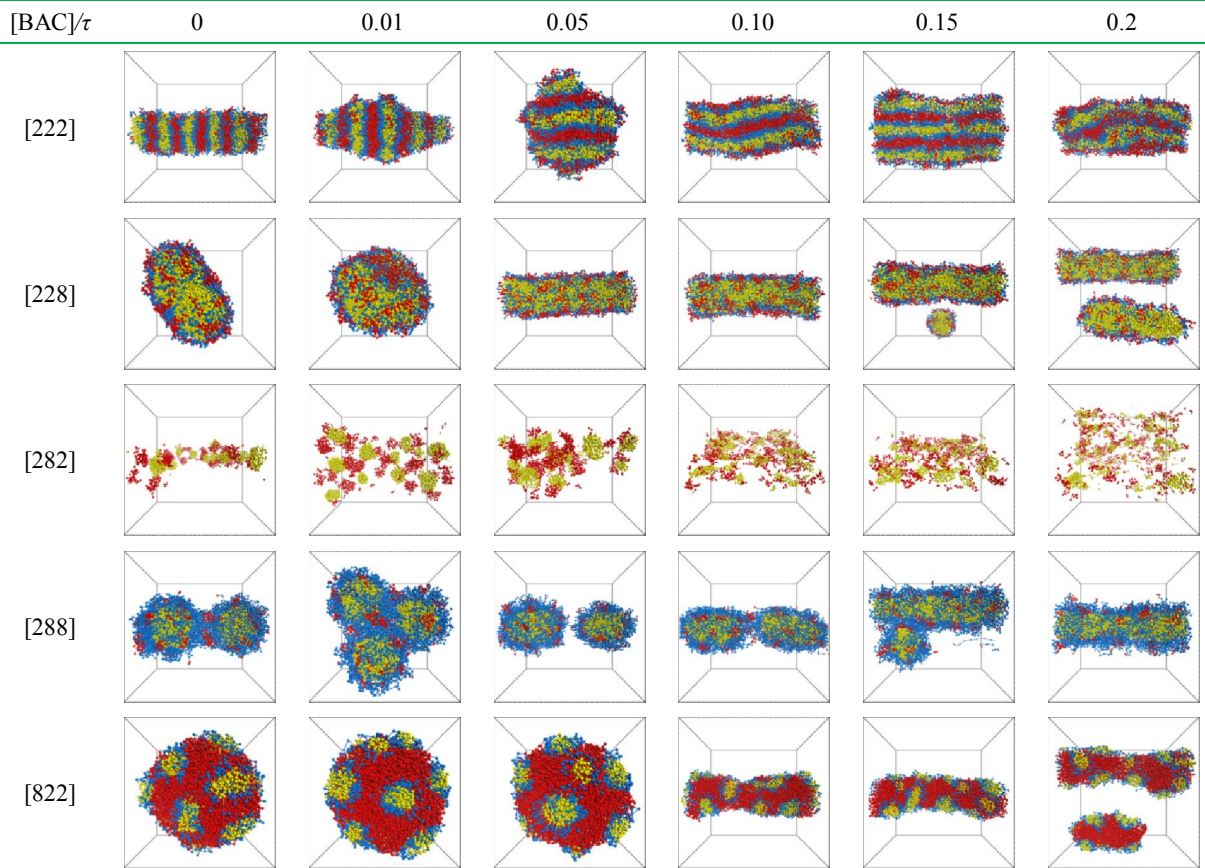

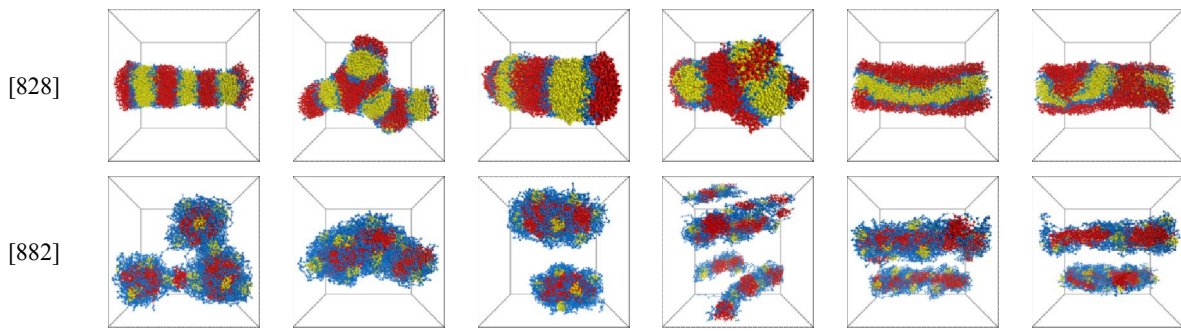

**Figure S4.**

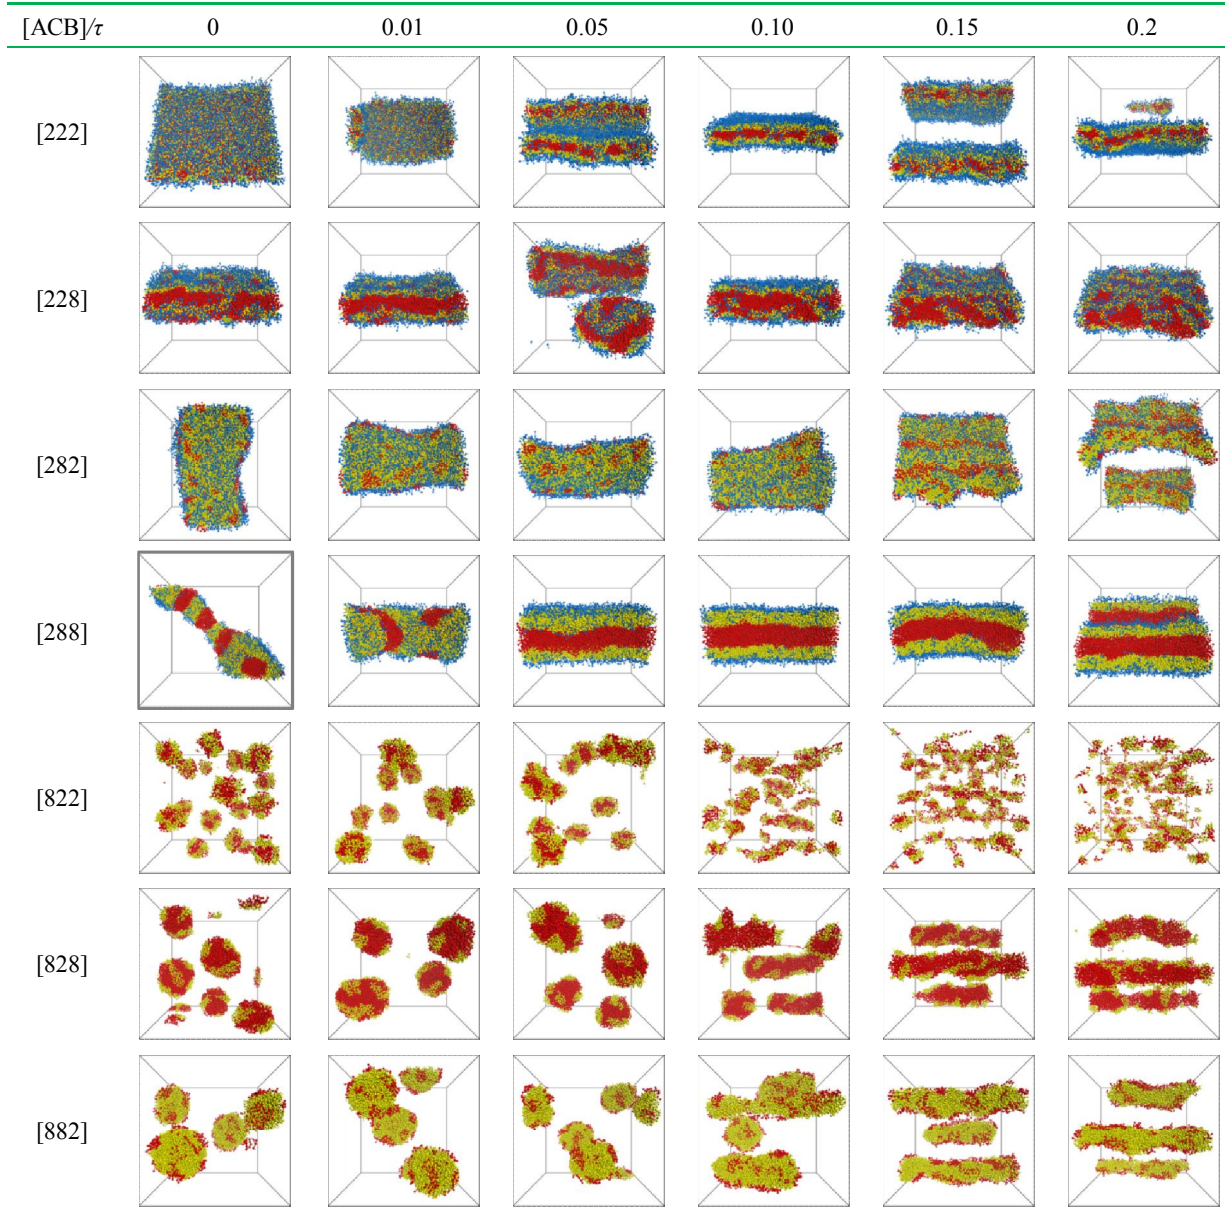

**Figure S5.**

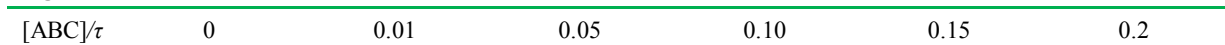

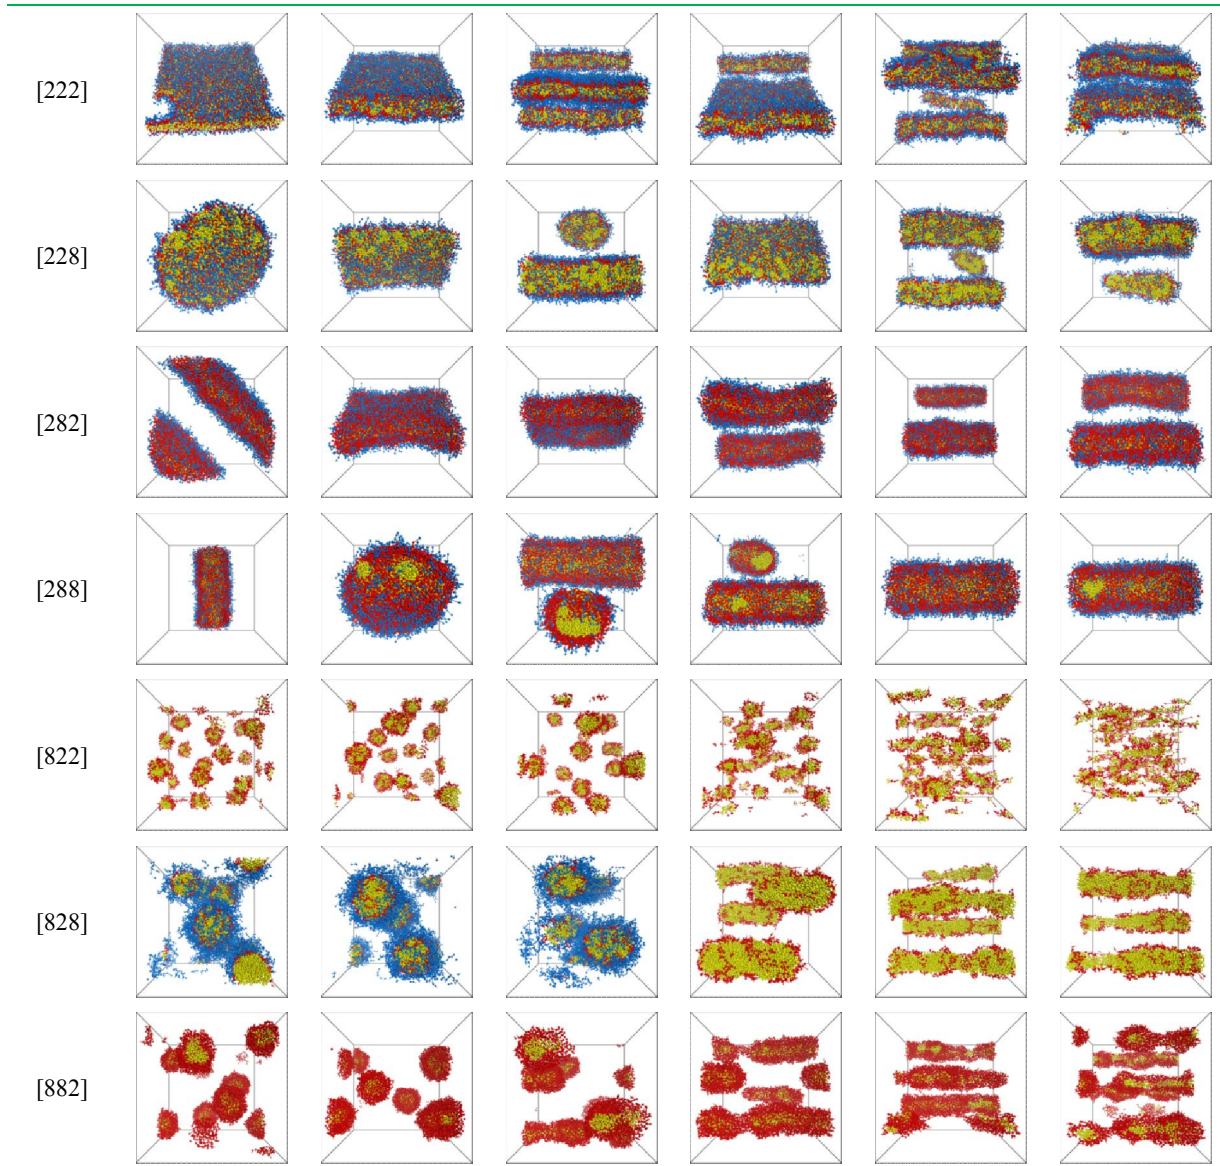

**Figure S6.**

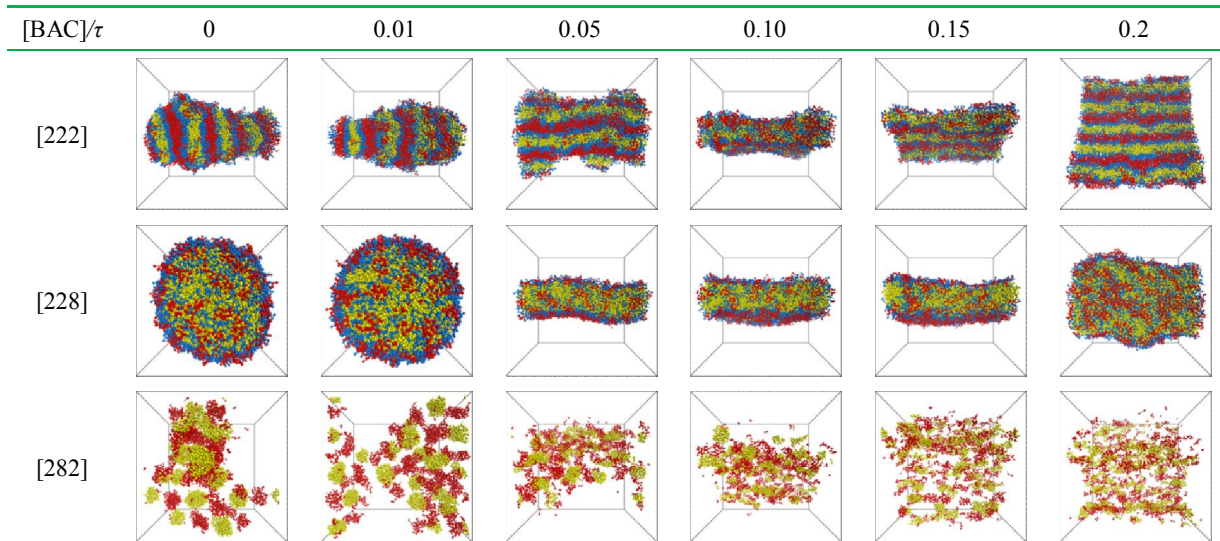

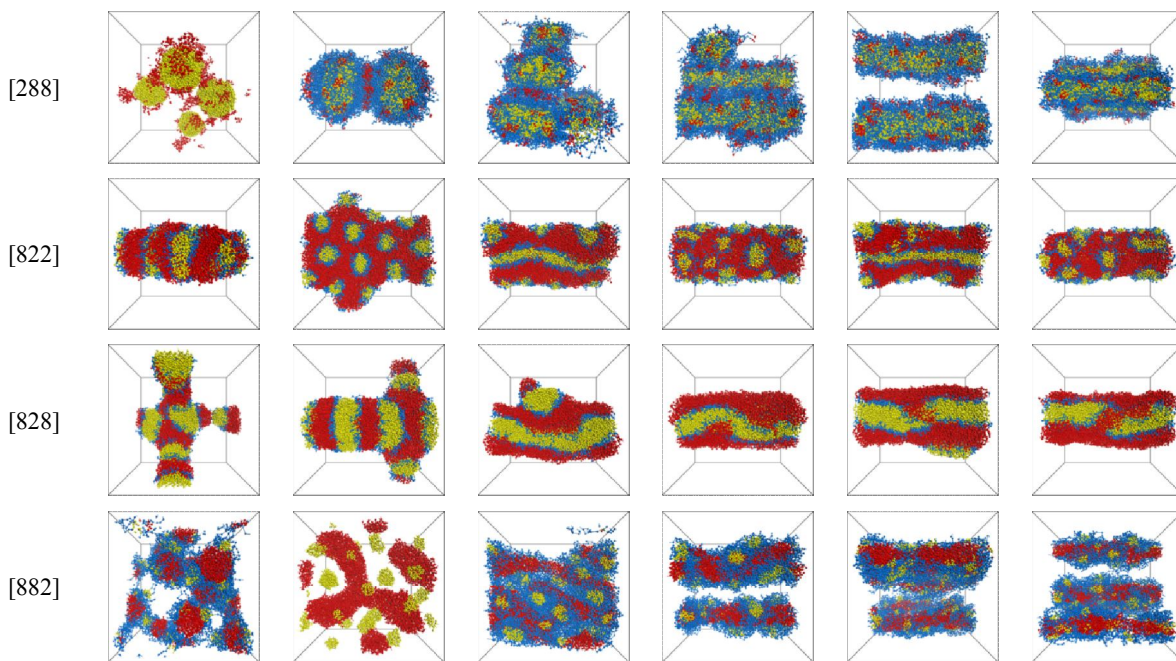

**Figure S7.**

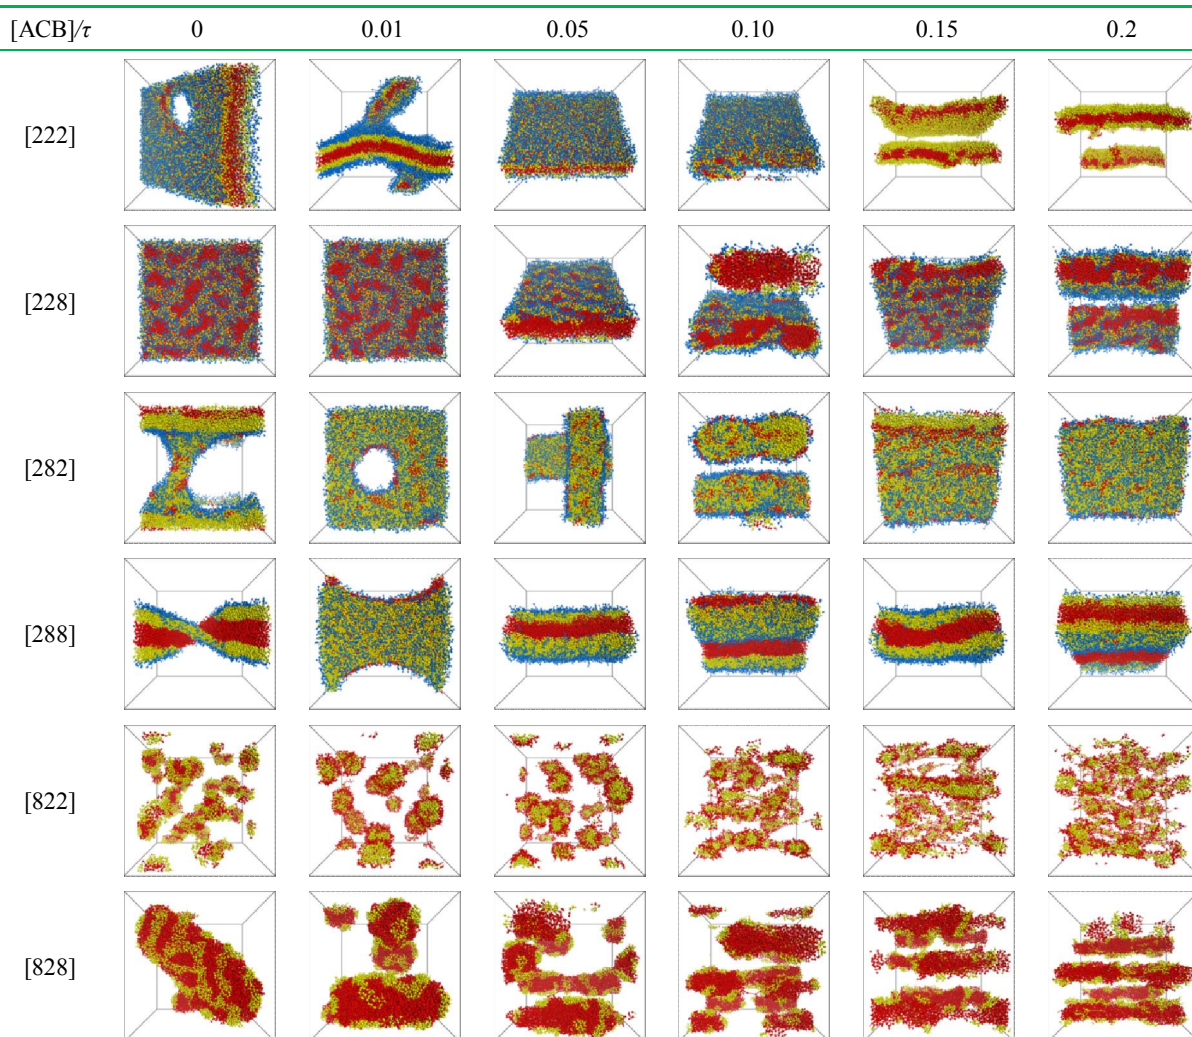

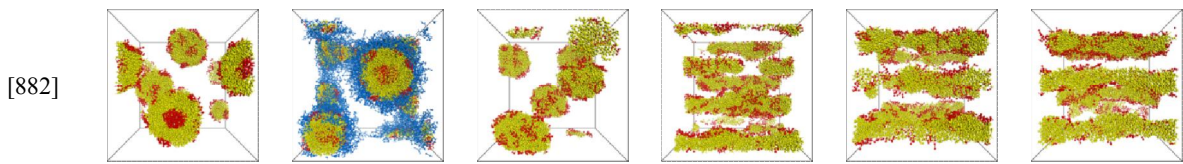

**Figure S8.**

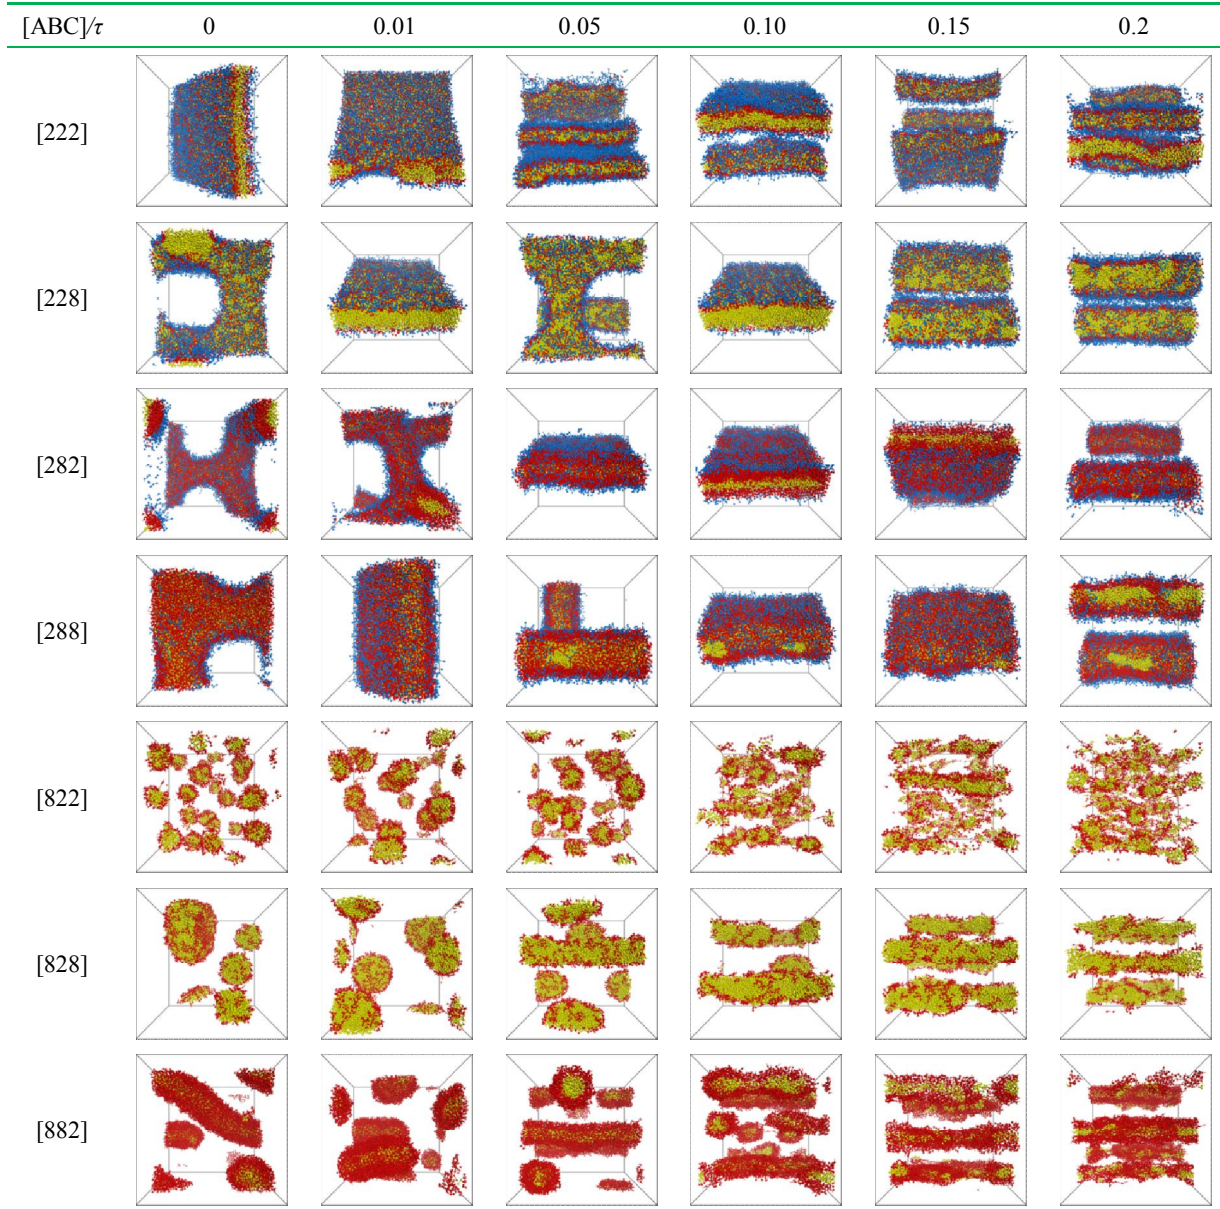

**Figure S9.**

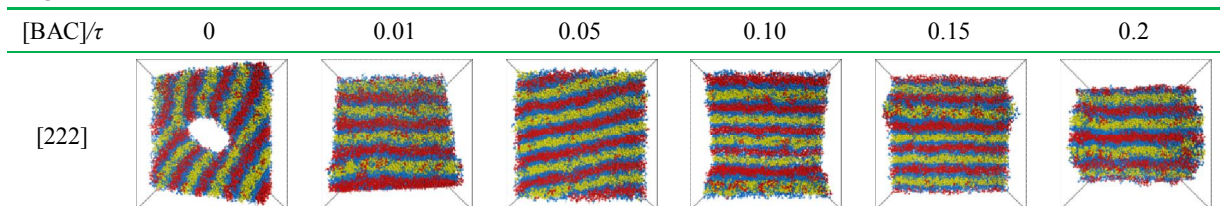

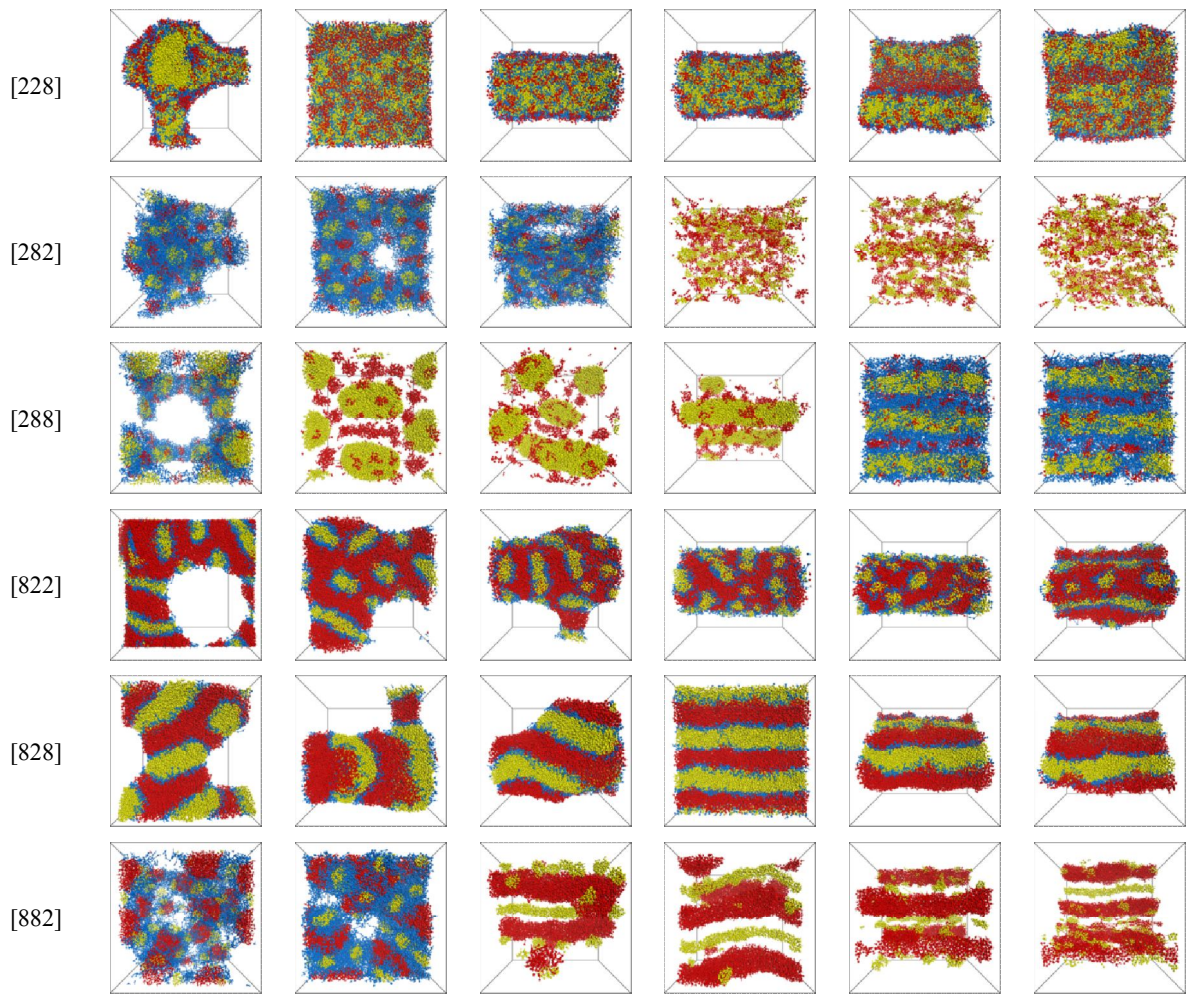

Supplement: c5ra23474c1.pdf [file c5ra23474c1.pdf]
